# Supplementary material
Source: publisher figshare collection journal article supplement (https://acs.figshare.com/ndownloader/files/8857276)
Supplement: Supplementary file 1 [file 8857276]

Compound_ID	SMILES
3	BrC(C=C1)=CC=C1NC2=CC=C(C(OC)=O)C=C2[N+]([O-])=O
4	NC1=CC(C(OC)=O)=CC=C1NC2=CC=C(Br)C=C2
5	CC1=NC2=CC(C(OC)=O)=CC=C2N1C3=NC=C(Br)C=C3
6	CC1=NC2=CC(C(OC)=O)=CC=C2N1C3=NC=C(C4=CC=CC(N)=C4)C=C3
7	CC1=NC2=CC(C(OC)=O)=CC=C2N1C3=NC=C(C4=CC=CC(NC(C5=CC=C(N=C(C)N6)C6=C5)=O)=C4)C=C3
8	CC1=NC2=CC(C(NCCN(C)C)=O)=CC=C2N1C3=NC=C(C4=CC=CC(NC(C5=CC=C(N=C(C)N6)C6=C5)=O)=C4)C=C3
9	CC1=NC2=CC(C(NCCCN3CCCC3)=O)=CC=C2N1C4=NC=C(C5=CC=CC(NC(C6=CC=C(N=C(C)N7)C7=C6)=O)=C5)C=C4
10	CC1=NC2=CC(C(NCCCN3CCN(C)CC3)=O)=CC=C2N1C4=NC=C(C5=CC=CC(NC(C6=CC=C(N=C(C)N7)C7=C6)=O)=C5)C=C4
11	CC1=NC2=CC(C(NCCCN(CC)CC)=O)=CC=C2N1C3=NC=C(C4=CC=CC(NC(C5=CC=C(N=C(C)N6)C6=C5)=O)=C4)C=C3
12	CC1=NC2=CC(C(NCCCN3CCOCC3)=O)=CC=C2N1C4=NC=C(C5=CC=CC(NC(C6=CC=C(N=C(C)N7)C7=C6)=O)=C5)C=C4
13	CC1=NC2=CC(C(NCCCN(C)C)=O)=CC=C2N1C3=NC=C(C4=CC=CC(NC(C5=CC=C(N=C(C)N6)C6=C5)=O)=C4)C=C3
14	CC1=NC2=CC(C(NCCCCN(C)C)=O)=CC=C2N1C3=NC=C(C4=CC=CC(NC(C5=CC=C(N=C(C)N6)C6=C5)=O)=C4)C=C3
15	O=C(OC)C1=CC=C(N=C(CCCN(C)C)N2)C2=C1
16	CC1=NC2=CC(C(OC)=O)=CC=C2N1C3=NC=C(C4=CC=CC(NC(C5=CC=C(N=C(CCCN(C)C)N6)C6=C5)=O)=C4)C=C3
17	CC1=NC2=CC(C(NCCCN(C)C)=O)=CC=C2N1C3=NC=C(C4=CC=CC(NC(C5=CC=C(N=C(CCCN(C)C)N6)C6=C5)=O)=C4)C=C3
18	CC1=NC2=CC(C(NCCCN(C)C)=O)=CC=C2N1C3=NC=C(Br)C=C3
19	CC1=NC2=CC(C(NCCCN(C)C)=O)=CC=C2N1C3=NC=C(C4=CC=CC(N)=C4)C=C3
20	CC1=NC2=CC(C(OC)=O)=CC=C2N1C3=NC=C(C4=CC=CC(NC(C5=CC=CC=C5)=O)=C4)C=C3
21	CC1=NC2=CC(C(NCCCN(C)C)=O)=CC=C2N1C3=NC=C(C4=CC=CC(NC(C5=CC=CC=C5)=O)=C4)C=C3
22	CC1=NC2=CC(C(OC)=O)=CC=C2N1C3=NC=C(C4=CC=CC(Br)=C4)C=C3
23	CC1=NC2=CC(C(OC)=O)=CC=C2N1C3=NC=C(C4=CC=CC(C5=CC=C(N=C(C)N6)C6=C5)=C4)C=C3
24	CC1=NC2=CC(C(NCCCN(C)C)=O)=CC=C2N1C3=NC=C(C4=CC=CC(C5=CC=C(N=C(C)N6)C6=C5)=C4)C=C3
